# Supplementary material
Source: PubMed Central journal article supplement (PMC11025329)
Supplement: jb.00452-23-s0009.pdf [file jb.00452-23-s0009.pdf]

## Supplemental material

### Alternate routes to mnm<sup>5</sup>s<sup>2</sup>U synthesis in Gram-positive bacteria

Marshall Jaroch<sup>a1</sup>, Guangxin Sun<sup>b,c1</sup>, Ho-Ching Tiffany Tsui<sup>d</sup>, Colbie Reed<sup>a</sup>, Jinjing Sun<sup>b,c</sup>, Marko Jörg<sup>a,&</sup>, Malcolm E. Winkler<sup>d</sup>, Kelly C. Rice<sup>a</sup>, Agnieszka Dziergowska<sup>e</sup>, Troy A. Stich<sup>f</sup>, Peter C. Dedon<sup>b,c</sup>, Patricia C. Dos Santos<sup>f,2</sup> and Valérie de Crécy-Lagard<sup>a,g,2</sup>

<sup>a</sup> Department of Microbiology and Cell Science, University of Florida, Gainesville, FL 32611;

<sup>b</sup> Department of Biological Engineering, Massachusetts Institute of Technology, Cambridge, MA 02139

<sup>c</sup> Singapore-MIT Alliance for Research and Technology, Singapore

<sup>d</sup> Department of Biology, Indiana University Bloomington, Bloomington, IN, USA

<sup>e</sup> Institute of Organic Chemistry, Lodz University of Technology, 90-924 Łódź, Poland

<sup>f</sup> Department of Chemistry, Wake Forest University, Winston-Salem, NC, 27101, USA

<sup>g</sup> University of Florida Genetics Institute, Gainesville, FL 32610, USA

<sup>1</sup> Contributed equally

<sup>2</sup> To whom correspondence may be addressed: [vcrcy@ufl.edu](mailto:vcrcy@ufl.edu) & [dossanpc@wfu.edu](mailto:dossanpc@wfu.edu)

& Current address Department of Pharmacology and Toxicology, Institute of Pharmaceutical and Biomedical Sciences, Johannes Gutenberg University Mainz, 55128 Mainz, Germany

## Supplemental Tables

**Table S1.** Distribution of MnmC2, MnmC1/C2 fusions, YtqA, and instances of YtqA homologs physically clustered with YtqB.

| Group Name            | Tax ID  | Number of Genomes | YtqA (%) | YtqA clusters w. YtqB (%) | MnmC2 (%) | MnmC1/C2 Fusion (%) | Of Those w/o MnmC (MnmC1, MnmC2, or MnmC1/C2 fusion) |                           |
|-----------------------|---------|-------------------|----------|---------------------------|-----------|---------------------|------------------------------------------------------|---------------------------|
|                       |         |                   |          |                           |           |                     | YtqA (%)                                             | YtqA clusters w. YtqB (%) |
| Acidobacteria         | 57723   | 7                 | 0        | NA                        | 0         | 0                   | 0                                                    | 0                         |
| Aquificae             | 187857  | 9                 | 89       | 13                        | 78        | 0                   | 100                                                  | 50                        |
| Bacteroidetes         | 200643  | 106               | 23       | 13                        | 85        | 0                   | 25                                                   | 6                         |
| Chlamydiae            | 204428  | 6                 | 0        | NA                        | 0         | 0                   | 0                                                    | 0                         |
| Chlorobi              | 1090    | 5                 | 0        | NA                        | 0         | 0                   | 0                                                    | 0                         |
| Chloroflexi           | 32061   | 5                 | 0        | NA                        | 0         | 0                   | 0                                                    | 0                         |
| Cyanobacteria         | 1117    | 41                | 5        | 0                         | 90        | 0                   | 25                                                   | 0                         |
| Deferribacteres       | 68337   | 5                 | 100      | 40                        | 0         | 0                   | 0                                                    | 0                         |
| Deinococcus-thermus   | 1297    | 6                 | 0        | NA                        | 0         | 0                   | 0                                                    | 0                         |
| Bacilli               | 91061   | 67                | 45       | 80                        | 0         | 0                   | 67                                                   | 36                        |
| Clostridia            | 186801  | 75                | 60       | 22                        | 0         | 0                   | 71                                                   | 13                        |
| Negativicutes         | 909932  | 10                | 60       | 83                        | 0         | 0                   | 70                                                   | 50                        |
| Tissierellia          | 1737404 | 8                 | 75       | 17                        | 0         | 0                   | 88                                                   | 13                        |
| Other Firmicutes      | 53420*  | 3                 | 33       | 100                       | 0         | 0                   | 67                                                   | 33                        |
| Fusobacteria          | 203490  | 6                 | 50       | 0                         | 0         | 0                   | 50                                                   | 0                         |
| Mollicutes            | 31969   | 14                | 14       | 50                        | 0         | 0                   | 14                                                   | 7                         |
| Planctomycetes        | 112     | 14                | 29       | 0                         | 0         | 0                   | 29                                                   | 0                         |
| Alphaproteobacteria   | 28211   | 150               | 0        | NA                        | 31        | 10                  | 0                                                    | 0                         |
| Betaproteobacteria    | 28216   | 99                | 12       | 33                        | 4         | 65                  | 3                                                    | 0                         |
| Deltaproteobacteria   | 28221   | 32                | 47       | 47                        | 19        | 0                   | 69                                                   | 27                        |
| Epsilonproteobacteria | 3031852 | 12                | 67       | 25                        | 75        | 8                   | 3                                                    | 0                         |
| Gammaproteobacteria   | 1236    | 222               | 18       | 41                        | 3         | 60                  | 1                                                    | 0                         |
| Other Proteobacteria  | 3018035 | 6                 | 17       | 100                       | 50        | 17                  | 0                                                    | 0                         |
| Spirochaetes          | 203692  | 10                | 40       | 0                         | 50        | 10                  | 75                                                   | 0                         |
| Synergistetes         | 508458  | 5                 | 40       | 0                         | 0         | 0                   | 40                                                   | 0                         |
| Thermotogae           | 188708  | 9                 | 56       | 40                        | 0         | 0                   | 78                                                   | 22                        |
| Verrucomicrobia       | 74201   | 9                 | 11       | 0                         | 33        | 0                   | 17                                                   | 0                         |
| Other Bacteria        | 2*      | 27                | 30       | 25                        | 15        | 0                   | 26                                                   | 9                         |

\*Taxonomic clades not included in iTOL trees

**Table S2.** DFT-computed geometric values<sup>a</sup> for Models of  $\text{cmnm}^5\text{s}^2\text{U}$  following H-atom abstraction

| Model                   | $\text{C}_c\text{—C}_d$ (Å) | $\text{N}_b\text{—C}_c$ (Å) | $\text{C}_a\text{—N}_b$ (Å) |
|-------------------------|-----------------------------|-----------------------------|-----------------------------|
| <b>UHH</b> <sup>b</sup> | 1.533                       | 1.487                       | 1.508                       |
| $\text{C}_c^\bullet$    | 1.459                       | 1.422                       | 1.516                       |
| $\text{N}_b^\bullet$    | 1.524                       | 1.431                       | 1.428                       |
| $\text{C}_a^\bullet$    | 1.524                       | 1.501                       | 1.458                       |
| <b>UH</b>               | 1.546                       | 1.470                       | 1.467                       |
| $\text{C}_c^\bullet$    | 1.444                       | 1.371                       | 1.454                       |
| $\text{N}_b^\bullet$    | 1.855                       | 1.372                       | 1.450                       |
| $\text{C}_a^\bullet$    | 1.540                       | 1.454                       | 1.374                       |
| <b>U</b>                | 1.592                       | 1.461                       | 1.511                       |
| $\text{C}_c^\bullet$    | 1.486                       | 1.384                       | 1.445                       |
| $\text{N}_b^\bullet$    | 1.677                       | 1.401                       | 1.435                       |
| $\text{C}_a^\bullet$    | 1.570                       | 1.449                       | 1.345                       |

- a. Bond lengths shown in blue are seen to shorten significantly upon the denoted H-atom abstraction, indicating partial double bond formation. Bond lengths shown in red are seen to lengthen indicating bond breaking.
- b. Geometric parameters listed for models named **UHH**, **UH**, and **U** are those for  $\text{cmnm}^5\text{s}^2\text{U}$  models *prior* to H-atom abstraction.

**Table S3. Strains and plasmids used.**

| Strain, plasmid      | Phenotype, genotype and/or description                                                                                                                                                                                                       | Ref/Source       |
|----------------------|----------------------------------------------------------------------------------------------------------------------------------------------------------------------------------------------------------------------------------------------|------------------|
| <i>S. pneumoniae</i> |                                                                                                                                                                                                                                              |                  |
| IU1824               | D39 $\text{rpsL1 } \Delta\text{cps rpsL1 spd}_{0567}(\text{mnmM})(\text{Q152stop})$                                                                                                                                                          | (1)              |
| IU19821              | D39 $\Delta\text{cps rpsL1 } \Delta\text{spd}_{0567}::\text{P}_c\text{-[sacB-kan-rpsL}^+]$                                                                                                                                                   | (2)              |
| IU19835              | D39 $\Delta\text{cps rpsL1 spd}_{0567}^+$                                                                                                                                                                                                    | (2)              |
| IU19964              | D39 $\Delta\text{cps rpsL1 } \Delta[\text{spd}_{0565-0566}] (\Delta\text{ytqA})$ markerless (IU19821 X fusion $\Delta[\text{spd}_{0565-0566}]$ amplicon)                                                                                     | This study       |
| IU19966              | D39 $\Delta\text{cps rpsL1 } \Delta\text{spd}_{0567} (\Delta\text{mnmM})$ markerless (IU19821 X fusion $\Delta\text{spd}_{0567}$ amplicon)                                                                                                   | This study       |
| IU19968              | D39 $\Delta\text{cps rpsL1 D39 } \Delta\text{cps rpsL1 } \Delta[\text{spd}_{0565-0567}] (\Delta\text{ytqA mnmM})$ markerless (IU19821 X fusion $\Delta[\text{spd}_{0565-0567}]$ amplicon)                                                    | This study       |
| IU19974              | D39 $\Delta\text{cps rpsL1 } \Delta\text{spd}_{0567} (\Delta\text{mnmM})$ markerless// $\Delta\text{bgaA}::\text{kan-t1t2-P}_{\text{Zn}}\text{-mnmM}^+$ (IU19966 X fusion $\Delta\text{bgaA}::\text{kan-t1t2-P}_{\text{Zn}}\text{-mnmM}^+$ ) | This study       |
| <i>B. subtilis</i>   |                                                                                                                                                                                                                                              |                  |
| CU1065               | Wild-Type, $\text{trpC2 attSP}\beta \text{ sfp0}$                                                                                                                                                                                            | Laboratory Stock |
| BKE30480             | CU1056 $\Delta\text{ytqA}::\text{Erm}^R$                                                                                                                                                                                                     | (3)              |
| BKE30490             | CU1056 $\Delta\text{mnmM}::\text{Erm}^R$                                                                                                                                                                                                     | (3)              |
| <i>S. mutans</i>     |                                                                                                                                                                                                                                              |                  |

|                   |                                                                                                                                                                |            |
|-------------------|----------------------------------------------------------------------------------------------------------------------------------------------------------------|------------|
| S. mutans UA159   | Serotype c, ATCC 700610                                                                                                                                        | (4)        |
| MSJ1093           | <i>S. mutans</i> UA159 $\Delta$ ytqA::Erm <sup>R</sup>                                                                                                         | This study |
| MSJ1095           | <i>S. mutans</i> $\Delta$ ymnmM::Erm <sup>R</sup>                                                                                                              | This study |
| MSJ1097           | <i>S. mutans</i> $\Delta$ ytqA mnmM::Erm <sup>R</sup>                                                                                                          | This study |
| <i>E. coli</i>    |                                                                                                                                                                |            |
| JW5380-2          | $\Delta$ (araD-araB)567, $\Delta$ lacZ4787(::rrnB-3), $\lambda$ , $\Delta$ trmC732::kan, rph-1, $\Delta$ (rhaD-rhaB)568, hsdR514                               | (5)        |
| TOP10             | F- mcrA $\Delta$ (mrr-hsdRMS-mcrBC) $\phi$ 80 lacZ $\Delta$ M15 $\Delta$ lacX74 recA1 ara $\Delta$ 139 $\Delta$ (ara-leu)7697 galU galK rpsL (StrR) endA1 nupG | Invitrogen |
| <b>Plasmids</b>   |                                                                                                                                                                |            |
| pBAD pBAD/Myc-His | Amp <sup>R</sup> , ColE1 arabinose inducible promoter                                                                                                          | (6)        |
| pDS358            | pBAD-ytqA <sub>Bsu</sub>                                                                                                                                       | This study |
| pDS359            | pBAD-ytqA <sub>Bsu</sub>                                                                                                                                       | This study |
| pDS365            | pBAD-ytqB <sub>Bsu</sub>                                                                                                                                       | This study |

**Table S4.** Oligonucleotides used

| Oligo                                             | Sequence 5' - 3'                  |
|---------------------------------------------------|-----------------------------------|
| For construction of MSJ1093                       |                                   |
| ytqA P1                                           | GCAGTGATTGCTTTAGTTGTCC            |
| ytqA P2                                           | GCGCGCTGCAGACAAAAAGTACAGCCACCATGA |
| ytqA P3                                           | GCGCGGAGCTCTCATTATCGTCTGACAGGTGA  |
| ytqA P4                                           | ATCCTCCTCTCGTAGAGGTA              |
| For construction of MSJ1095                       |                                   |
| ytqB P1                                           | GTGATGGAAGTGTGGCTCATG             |
| ytqB P2                                           | GCGCGCTGCAGGGCCTGTTCTGTACATCAAAA  |
| ytqB P3                                           | GCGCGGAGCTCGGGTGGCGATAAGGAAAAAGAT |
| ytqBP4                                            | AGTCAAAAAGGGAGAAAATTGGGT          |
| For construction of MSJ1097                       |                                   |
| ytqAB P1                                          | GCAGTGATTGCTTTAGTTGTCC            |
| ytqAB P2                                          | GCGCGCTGCAGCGTACAAAAAGTACAGCCACCA |
| ytqAB P3                                          | GCGCGGAGCTCGGGTGGCGATAAGGAAAAAGAT |
| ytqAB P4                                          | AGTCAAAAAGGGAGAAAATTGGGT          |
| For verification of MSJ1062 and MSJ1063           |                                   |
| BSU_ytqB_VF                                       | CAAAGAAGTGTGAAAATGGCC             |
| BSU_ytqB_VR                                       | TGCTGATTGATAAACCCGTATGT           |
| BSU_ytqA_VF                                       | GCACGAAAAATGGAAGGACG              |
| BSU_ytqA_VR                                       | GCCGTGTTTTCTTAATTTATTGACG         |
| For verification of MSJ1093, MSJ1095, and MSJ1097 |                                   |
| SMU_ytqA_VF                                       | CCAGTGTGTTAACTGGAATCAC            |
| SMU_ytqA_VR                                       | AGTCGCATCAATGGCTATACTG            |
| SMU_ytqB_VF                                       | CATTCATCGTCTGACAGGTGA             |

|                                                    |                                                                   |
|----------------------------------------------------|-------------------------------------------------------------------|
| SMU_ytqB_VR                                        | ATCCTCCTCCTTCGTAGAGGTA                                            |
| For construction of IU19964                        |                                                                   |
| TT1519                                             | GGCATGATAGAAGGCGTAGAAGTGATGTTCTCC                                 |
| TT1618                                             | TTACAGCCTTGCATCCTTGAACACTTCCTTCTCCAAAGAGTTTTCGATAATAATCATT        |
| TT1619                                             | AATGATTATTATCGAAAACCTTTGGAGAAGGAAGTGTTCAAGGATGCAAGGCTGTAA         |
| TT1520                                             | CCAGAAGCATCATTCAAGAGTCCTTCGCCC                                    |
| For construction of IU19966                        |                                                                   |
| TT1522                                             | GTCCCTATTGATGCGGAATTTGACTGTCCC                                    |
| TT1623                                             | AATCATCACTAAAAACGGCGGGTTGTTGACTCCCATAGTCGCATCCACTACGACATCCT<br>C  |
| TT1624                                             | GAGGATGTCGTAGTGGATGCGACTATGGGAGTCAACAACCCGCCGTTTTTAGTGATGA<br>TT  |
| TT1520                                             | CCAGAAGCATCATTCAAGAGTCCTTCGCCC                                    |
| For construction of IU19968                        |                                                                   |
| TT1519                                             | GGCATGATAGAAGGCGTAGAAGTGATGTTCTCC                                 |
| TT1621                                             | ATCATCACTAAAAACGGCGGGTTGTTGACTTCTCCAAAGAGTTTTCGATAATAATCATT       |
| TT1622                                             | AATGATTATTATCGAAAACCTTTGGAGAAGTCAACAACCCGCCGTTTTTAGTGATGAT        |
| TT1520                                             | CCAGAAGCATCATTCAAGAGTCCTTCGCCC                                    |
| For construction of IU19974                        |                                                                   |
| TT657                                              | CGCCCCAAGTTCATACCAATGACATCAAC                                     |
| TT1577                                             | TGCCATCTCAAGTGGTCTTTTCATTTTCAATACATCGCTTCTCTCTATCTTCCTTGTTA       |
| TT1578                                             | TAACAAGGAAGATAGAGAGGAAGCGATGTATTGAAAATGAAAAGACCACTTGAGATG<br>GCA  |
| TT1579                                             | ACTGGTTTATGAGAAAGTAAGTTCTTTTATCCATGTCTGTATCTCTCTAATTTTTCAATC      |
| TT1580                                             | AAAAATTAGAGAGATACAGACATGGATAAAAGAACTTACTTTCTCATAAACCAAGTTGCT<br>G |
| CS121                                              | GCTTTCTTGAGGCAATTCACCTGGTGC                                       |
| For Construction of pBAD24 Complementation Vectors |                                                                   |
| YtqA_NcoI_F                                        | GTACCATGGAGAACAATCCTTTTCCTTATTCAAATAC                             |
| YtqA_XhoI/BamHI_R                                  | ACTGGATCCTCACTCGAGCGCTGATTCCTCCTCAAGCCG                           |
| YtqB_BamHI_R                                       | GACTGGATCCTCATTTGCTGATCTGAGCTTTT                                  |
| YtqB_NcoI_F                                        | GTACCATGGTTTTGAAGAAAATTCTTCCTTACAGCAA                             |
|                                                    |                                                                   |

**Table S5.** Buffer gradient used in the LC-MS/MS Method 2. Buffer A: 0.02% Formic acid in double distilled water. Buffer B: 0.02% Formic acid in 70% Acetonitrile.

| Time (min) | Buffer A (%) | Buffer B (%) | Flow (ml/min) |
|------------|--------------|--------------|---------------|
| 0          | 100          | 0            | 0.3           |
| 5          | 99           | 1            | 0.3           |
| 6          | 98           | 2            | 0.3           |
| 7          | 97           | 3            | 0.3           |
| 8          | 95           | 5            | 0.3           |
| 9          | 93           | 7            | 0.3           |
| 10         | 90           | 10           | 0.3           |
| 12         | 88           | 12           | 0.3           |
| 13         | 85           | 15           | 0.3           |
| 15         | 80           | 20           | 0.3           |
| 16         | 25           | 75           | 0.3           |
| 17         | 0            | 100          | 0.3           |
| 18         | 0            | 100          | 0.3           |
| 20         | 0            | 100          | 0.3           |
| 21         | 100          | 0            | 0.3           |
| 25         | 100          | 0            | 0.3           |

**Table S6.** Identifiers for proteins and genomes used in Fig. S4 and S5

| YtqA_Name in FigS4A | Genome                         | Genome ID | Accession | BRC ID                | RefSeq Locus Tag | Protein ID  | AA length |
|---------------------|--------------------------------|-----------|-----------|-----------------------|------------------|-------------|-----------|
| N_Spneumoniae_ST556 | Streptococcus pneumoniae ST556 | 1130804.3 | CP003357  | fig 1130804.3.peg.715 | MY_0697          | AFC94358.1  | 169       |
| C_Spneumoniae_ST556 | Streptococcus pneumoniae ST556 | 1130804.3 | CP003357  | fig 1130804.3.peg.716 | MY_0698          | AFC94359.1  | 64        |
| N_Spneumoniae_TIGR4 | Streptococcus pneumoniae TIGR4 | 170187.11 | NC_003028 | fig 170187.11.peg.680 |                  |             | 169       |
| C_Spneumoniae_TIGR4 | Streptococcus pneumoniae TIGR4 | 170187.11 | NC_003028 | fig 170187.11.peg.681 |                  |             | 148       |
| N_Spneumoniae_R6    | Streptococcus pneumoniae R6    | 171101.6  | NC_003098 | fig 171101.6.peg.635  | spr0569          | NP_358163.1 | 150       |

|                            |                                 |           |              |                       |            |             |     |
|----------------------------|---------------------------------|-----------|--------------|-----------------------|------------|-------------|-----|
| C_Spneumoniae_R6           | Streptococcus pneumoniae R6     | 171101.6  | NC_003098    | fig 171101.6.peg.636  | spr0570    | NP_358164.1 | 148 |
| N_Spneumoniae_D39          | Streptococcus pneumoniae D39    | 373153.27 | NC_008533    | fig 373153.27.peg.643 | SPD_0565   | YP_816064.1 | 150 |
| C_Spneumoniae_D39          | Streptococcus pneumoniae D39    | 373153.27 | NC_008533    | fig 373153.27.peg.644 | SPD_0566   | YP_816065.1 | 148 |
| Smitis_OT25                | Streptococcus mitis strain OT25 | 28037.212 | JYGP01000002 | fig 28037.212.peg.409 | TZ90_00447 | KJQ68083.1  | 318 |
| Smutans_UA159              | Streptococcus mutans UA159      | 210007.7  | NC_004350    | fig 210007.7.peg.1517 | SMU.1699c  | NP_722028.1 | 310 |
| <b>MnmM_Name in FigS4A</b> |                                 |           |              |                       |            |             |     |
| Spneumoniae_ST556          | Streptococcus pneumoniae ST556  | 1130804.3 | CP003357     | fig 1130804.3.peg.717 | MYY_0699   | AFC94360.1  | 185 |
| Spneumoniae_TIGR4          | Streptococcus pneumoniae TIGR4  | 170187.11 | NC_003028    | fig 170187.11.peg.682 | SP_0652    | NP_345157.1 | 185 |
| Spneumoniae_R6             | Streptococcus pneumoniae R6     | 171101.6  | NC_003098    | fig 171101.6.peg.637  | spr0571    | NP_358165.1 | 185 |
| Smutans_UA159              | Streptococcus mutans UA159      | 210007.7  | NC_004350    | fig 210007.7.peg.1516 | SMU.1697c  | NP_722027.1 | 181 |
| Smitis_OT25                | Streptococcus mitis strain OT25 | 28037.212 | JYGP01000002 | fig 28037.212.peg.410 | TZ90_00448 |             | 185 |
| Spneumoniae_D39            | Streptococcus pneumoniae D39    | 373153.27 | NC_008533    | fig 373153.27.peg.645 | SPD_0567   | YP_816066.1 | 185 |

## Supplemental Figures

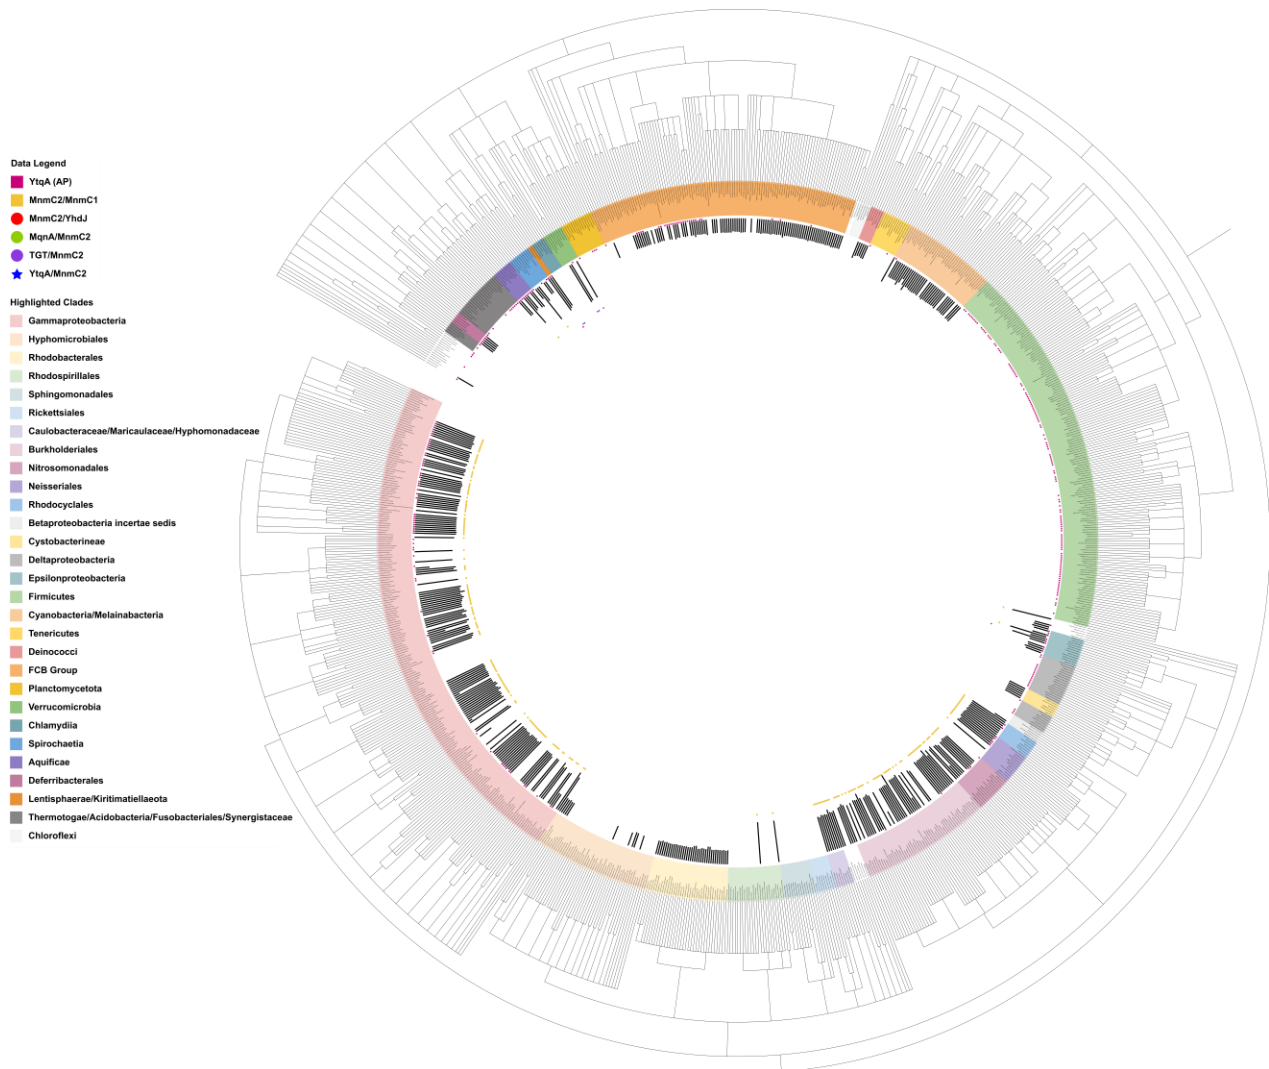

**Figure S1. Distribution of MnmC2 and MnmC2 fusions in the bacterial COG database genomes.** The presence of MnmC2 is represented by the respective homologs' lengths shown by the black histograms (2<sup>nd</sup> row, from outside-in) (**Supplemental data S3**). YtqA absence-presence is also shown by the fuchsia squares (1<sup>st</sup> row, outside-in). MnmC2/MnmC1 fusions are denoted by the goldenrod squares (3<sup>rd</sup> row). MnmC2/YhdJ fusions were noted by red circles (7<sup>th</sup> row) and MqnA(MqnD)/MnmC2 fusions by green circles (4<sup>th</sup> row), while the TGT/MnmC2 and YtqA/MnmC2 fusions were denoted by purple circles (5<sup>th</sup> row) and blue stars (6<sup>th</sup> row), respectively (derived from fusion data, **Supplemental data S3 and S4**). Clades of interest are highlighted in various colors across leaf labels, the key to which is provided left of the figure. An interactive version of this tree can be accessed at <https://itol.embl.de/tree/8216522107187281668281889>.



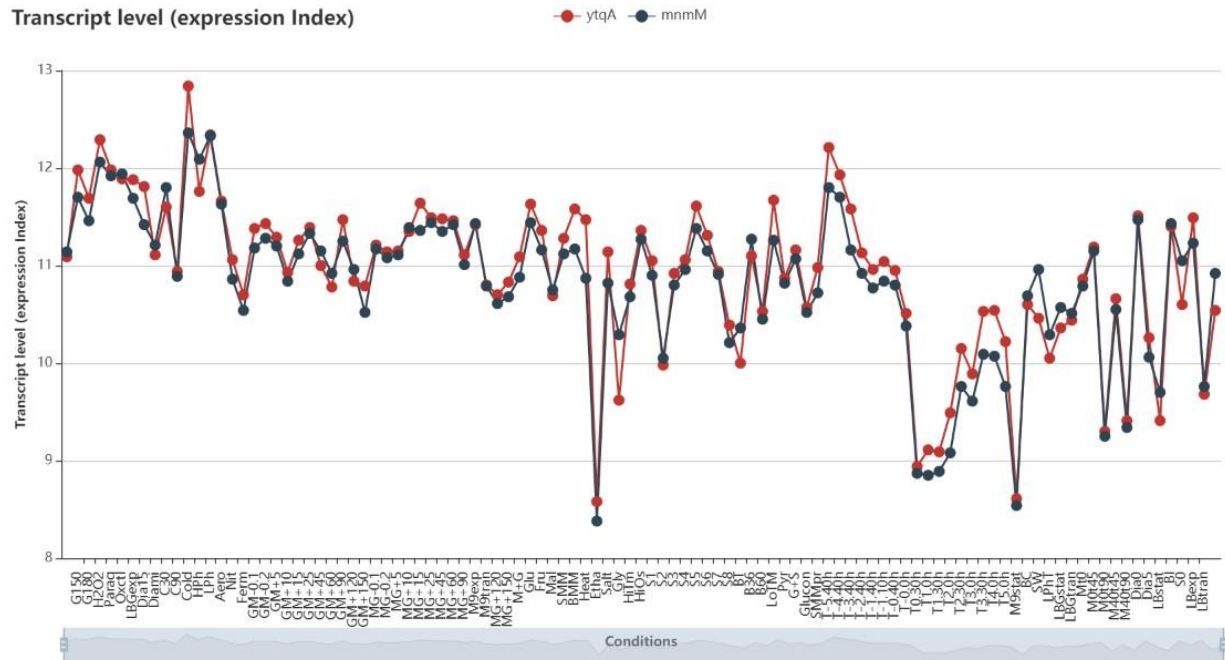

**Figure S2. Coexpression of YtgA and YtgB/MnmM in *B. subtilis*.** Data extracted from SubtiWiki <http://subtiwiki.uni-goettingen.de/> expression browser using BSU\_30480 (*ytqA*) and BSU\_30490 (*mnmM*) as inputs.

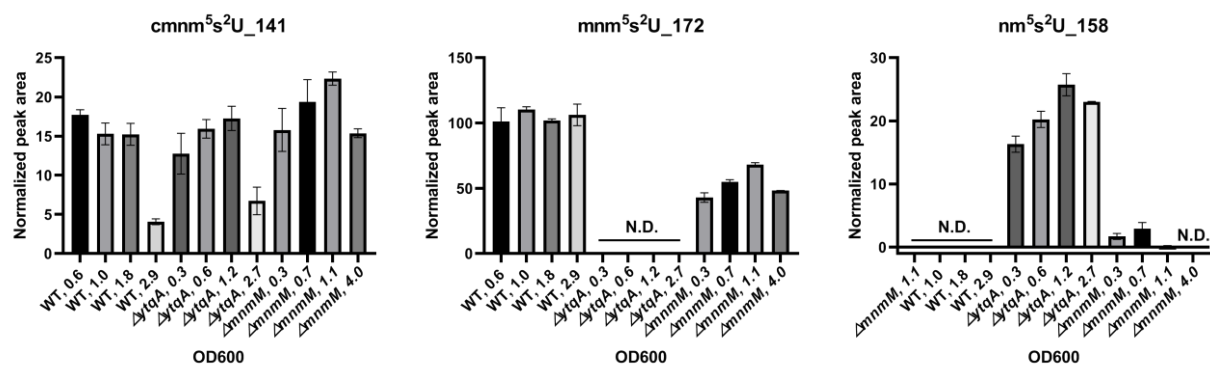

**Figure S3.** Analysis of xm<sup>5</sup>s<sup>2</sup>U profiles in *Bacillus subtilis* WT and *ytqA* and *mnmM* mutant strains. Normalized peak area values for cmnm<sup>5</sup>s<sup>2</sup>U, mnm<sup>5</sup>s<sup>2</sup>U and nm<sup>5</sup>s<sup>2</sup>U. The modification signals were based on specific transitions (cmnm<sup>5</sup>s<sup>2</sup>U\_141, mnm<sup>5</sup>s<sup>2</sup>U\_172 and nm<sup>5</sup>s<sup>2</sup>U\_158) and were confirmed by both qualifier and quantifier transitions; 200 ng of hydrolysate was injected. tRNA samples were processed through VDCL2 method and analyzed through LC-MS method 2 as described in the methods section. N.D., Not detected. Samples were extracted at different stages of growth with OD (A<sub>600nm</sub>) ranging from 0.3 to 4. Data represent the mean ±SD for 2 technical replicates.

A

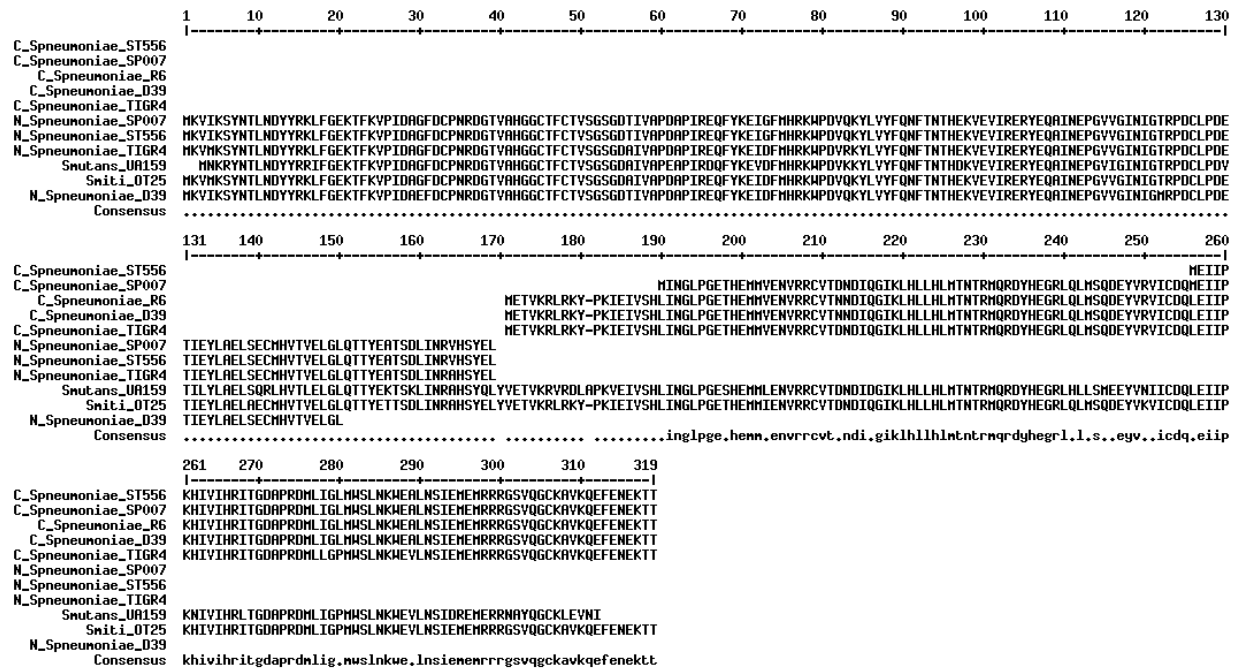

B

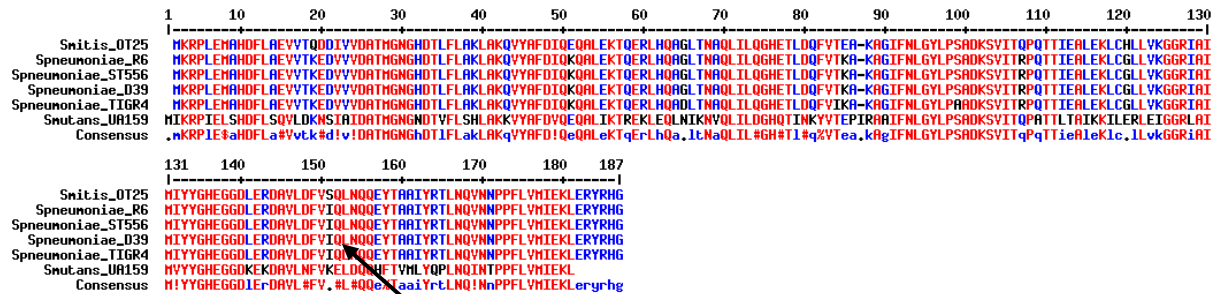

**Figure S4.** Sequence similarities of YtqA orthologs. **(A)** Alignments of truncated YtqA proteins from different *S. pneumoniae* strains (N-terminal and C-terminal halves are noted by a “C” or and an “N” in front of the species name) with full-length YtqA sequence from *S. mutans* (SMU\_1699c) and *S. mitis* (TZ90\_00447) using MultiAlin with default parameters. **(B)** Alignment of MnmM sequences from different *S. pneumoniae* strains with *S. mutans* (SMU\_1697) and *S. mitis* (TZ90\_00448) homologs. The location of the Q152STOP mutation that occurred in the IU1824 strain is shown with an arrow. Identifiers for all proteins in the alignments are listed in **Table S6**.

**A**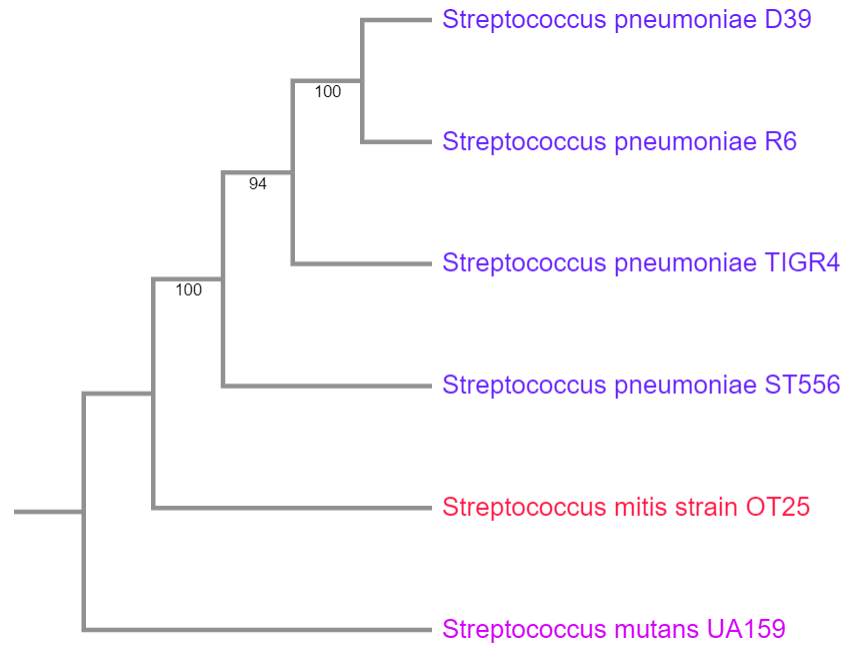**B**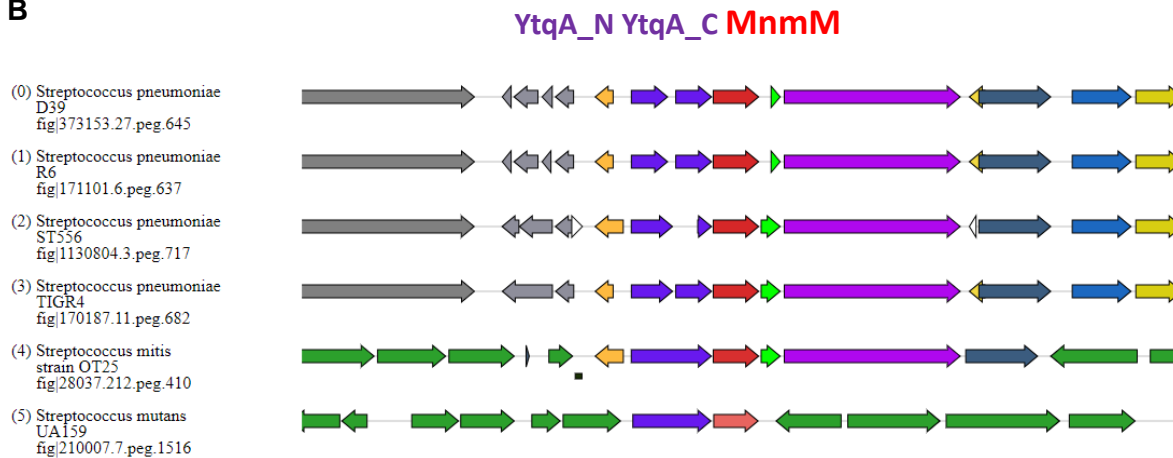

**Figure S5.** Diversity of *Streptococci*  $mnm^{5s2U}$  biosynthetic genes. **(A)** The species tree shows the relationship between the *S. pneumoniae*, *S. mutans*, and *S. mitis* strains discussed in this study. The tree was built using BV-BRC bacterial Phylogenetic Tree Service that used the Codon Tree method that selects single-copy BV-BRC PGFams and analyzes aligned proteins and coding DNA from single-copy genes using the program RAXML (7). **(B)** Gene neighborhoods generated using Gizmogene around the *mnmM* ( in red) genes from the genomes shown in (A), showing the full-length or truncated *ytqA* (*ytqA\_N* and *ytqA\_C* genes ( in purple). Identifiers for all genomes and genes are given in **Table S6**.

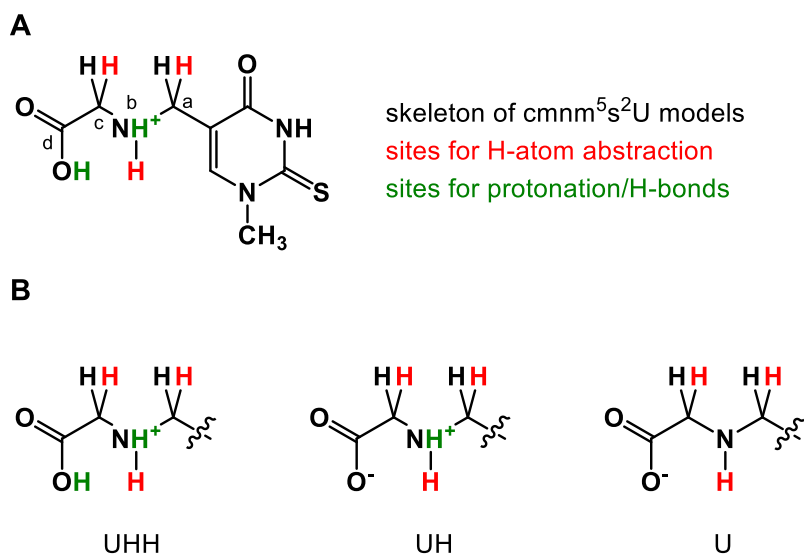

**Figure S6.** Models of  $\text{cmnm}^5\text{s}^2\text{U}$  employed in DFT calculations. Three different protonation states were considered (sites shown in green): UHH, where the carboxylate and amide functional groups of the pendant glycine are protonated; UH, in which only the amide is protonated; and U, in which neither group is protonated. Three sites for H-atom abstraction were considered (sites shown in red): the glycine alpha carbon ( $\text{C}_c$ ); the amide nitrogen ( $\text{N}_b$ ); and the  $^5\text{U}$ -methylene carbon ( $\text{C}_a$ ).

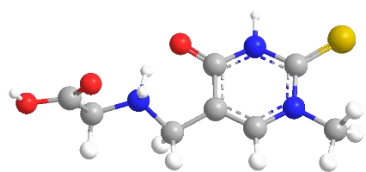

**UHH**

| atom  | x (Å)  | y (Å)  | z (Å)  |
|-------|--------|--------|--------|
| C(1)  | 0.211  | 0.533  | -0.651 |
| C(2)  | 0.335  | 1.318  | 0.570  |
| C(3)  | 1.489  | 1.189  | 1.311  |
| O(4)  | -0.769 | 0.611  | -1.431 |
| N(5)  | 1.277  | -0.300 | -0.923 |
| C(6)  | -0.859 | 2.135  | 0.996  |
| N(7)  | 2.511  | 0.349  | 0.969  |
| C(8)  | 3.717  | 0.264  | 1.809  |
| C(9)  | 2.451  | -0.466 | -0.183 |
| S(10) | 3.643  | -1.509 | -0.640 |
| N(11) | -1.485 | 2.765  | -0.222 |
| C(12) | -2.847 | 3.342  | -0.073 |
| C(13) | -2.858 | 4.658  | -0.860 |
| O(14) | -4.077 | 5.177  | -0.946 |
| O(15) | -1.830 | 5.133  | -1.312 |
| H(16) | 1.641  | 1.758  | 2.242  |
| H(17) | 1.222  | -0.866 | -1.780 |
| H(18) | -0.601 | 2.919  | 1.734  |
| H(19) | -1.643 | 1.486  | 1.443  |
| H(20) | 4.609  | 0.540  | 1.214  |
| H(21) | 3.854  | -0.775 | 2.165  |
| H(22) | 3.600  | 0.951  | 2.666  |
| H(23) | -1.426 | 1.937  | -0.949 |
| H(24) | -0.901 | 3.549  | -0.608 |
| H(25) | -3.067 | 3.558  | 0.994  |
| H(26) | -3.621 | 2.642  | -0.443 |
| H(27) | -4.026 | 6.030  | -1.438 |

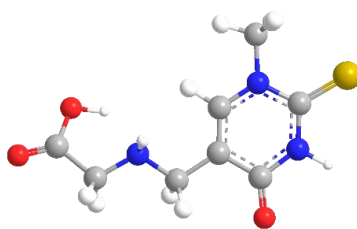

**UH**

| atom  | x (Å)  | y (Å)  | z (Å)  |
|-------|--------|--------|--------|
| C(1)  | -0.059 | -0.800 | -0.077 |
| C(2)  | -0.059 | 0.662  | 0.060  |
| C(3)  | 1.121  | 1.292  | 0.349  |
| O(4)  | -1.036 | -1.496 | -0.342 |
| N(5)  | 1.214  | -1.376 | 0.127  |
| C(6)  | -1.373 | 1.370  | -0.158 |
| N(7)  | 2.323  | 0.633  | 0.532  |
| C(8)  | 3.538  | 1.390  | 0.848  |
| C(9)  | 2.415  | -0.756 | 0.423  |
| S(10) | 3.833  | -1.607 | 0.629  |
| N(11) | -1.374 | 2.749  | 0.345  |
| C(12) | -2.593 | 3.524  | 0.073  |
| C(13) | -2.264 | 5.027  | -0.079 |
| O(14) | -3.102 | 5.901  | -0.041 |
| O(15) | -0.952 | 5.240  | -0.298 |
| H(16) | 1.169  | 2.387  | 0.449  |
| H(17) | 1.264  | -2.397 | 0.040  |
| H(18) | -2.178 | 0.734  | 0.283  |
| H(19) | -1.595 | 1.402  | -1.249 |
| H(20) | 4.307  | 1.221  | 0.070  |
| H(21) | 3.961  | 1.047  | 1.813  |
| H(22) | 3.280  | 2.463  | 0.903  |
| H(23) | -0.567 | 4.314  | -0.238 |
| H(24) | -1.193 | 2.738  | 1.359  |
| H(25) | -3.401 | 3.410  | 0.828  |
| H(26) | -3.021 | 3.194  | -0.898 |

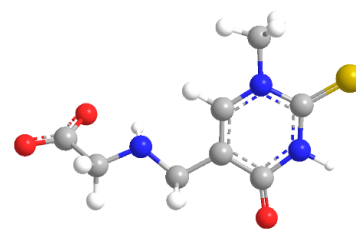

**U**

| atom  | x (Å)  | y (Å)  | z (Å)  |
|-------|--------|--------|--------|
| C(1)  | -0.025 | -0.762 | -0.345 |
| C(2)  | -0.109 | 0.648  | 0.029  |
| C(3)  | 1.017  | 1.272  | 0.493  |
| O(4)  | -0.929 | -1.481 | -0.770 |
| N(5)  | 1.279  | -1.303 | -0.156 |
| C(6)  | -1.413 | 1.405  | -0.071 |
| N(7)  | 2.251  | 0.648  | 0.633  |
| C(8)  | 3.400  | 1.409  | 1.122  |
| C(9)  | 2.422  | -0.688 | 0.309  |
| S(10) | 3.881  | -1.511 | 0.459  |
| N(11) | -1.253 | 2.798  | 0.257  |
| C(12) | -2.466 | 3.609  | 0.331  |
| C(13) | -2.185 | 5.001  | -0.389 |
| O(14) | -3.031 | 5.902  | -0.203 |
| O(15) | -1.127 | 5.001  | -1.096 |
| H(16) | 0.937  | 2.328  | 0.800  |
| H(17) | 1.388  | -2.293 | -0.397 |
| H(18) | -2.136 | 0.920  | 0.629  |
| H(19) | -1.847 | 1.197  | -1.091 |
| H(20) | 4.218  | 1.392  | 0.374  |
| H(21) | 3.796  | 0.955  | 2.052  |
| H(22) | 3.074  | 2.448  | 1.308  |
| H(23) | -0.732 | 3.334  | -0.491 |
| H(24) | -2.802 | 3.801  | 1.376  |
| H(25) | -3.334 | 3.142  | -0.202 |

**Figure S7.** Geometry optimized models and xyz coordinates (Å) of  $cmnm^5s^2U$  that were further geometry-optimized after H-atom abstraction.

## **Supplemental data description**

### **Data S1**

List of the 968 organisms in the COG database that encode the three proteins MnmA, MnmG and MnmE and distribution of the COG4121( MnmC) in those genomes.

### **Data S2**

Summary of MnmC1/MnmC2/MnmC1C2 distributions across bacterial orders in the benchmark set of 968 genomes.

### **Data S3**

Domain analysis of MnmC1/MnmC2/MnmC1C2 (via CDD Search) in homologs present in benchmark set of 968 genomes

### **Data S4**

(a) List of YtqA/mnmM, MnmC1/MnmM and YtqA/MnmC2 fusion proteins present in InterPro; (b) YtqA/YhcC family proteins found in the benchmark set of 968 genomes.

### **Data S5**

YtqA/YhcC gene clusters (a) all, (b) those with mnmM. YtqAs taken from initial COG Db fusion analysis) (c) YtqA/YhcC-physically clustered gene analyses identifying methylase/methyltransferase domains via three methods, results in numeric form (1, BLASTp; 2, CDD Search; 3, InterProScan); (d) YtqA-physically clustered gene analyses identifying methylase/methyltransferase domains via three methods, results with all hit sequence identifiers (1, BLASTp; 2, CDD Search; 3, InterProScan); (e) summary metrics for different methods determining methylase/methyltransferase domains among genes physically-clustered with YtqA/YhcC

### **Data S6**

MnmC1/MnmC2/MnmC1C2, and physically clustered YtqA-MnmM occurrence data across bacterial orders. Data for each set of sequences includes the incidence counts across genomes and the calculated frequency for each bacterial order. These different sets of data was used to generate Fig. 2. All column counts/percentages were determined independently of each other, and, therein, MnmC1 and MnmC2 counts could be part of fusions or non-fused free-standing domains (\*factually, however, the latter is not the case for MnmC1 as its occurrence was always observed in the form of a fusion).

### **Data S7**

Differential YtqA gene cluster, MnmC1/MnmC2/MnmC1C2 fusion analysis data summary tables. For organisms containing YtqA from the benchmark genome set (filtered for positive MnmAGE status), the distributions of retrieved YtqA gene cluster data across genomes of select MnmC1/MnmC2/MnmC1C2 encoding statuses (subtables are labeled with their respective genome statuses).

### **Data S8**

Complete YtqA/YhcC gene cluster, MnmC1/MnmC2/MnmC1C2 fusion analysis data mapping to SSN Figure: (a) "Node Count Cluster Number" mapped to "Sequence Count Cluster Number" for SSN mapping;"Node Count Cluster Number" is the actual cluster number within the SSN figure (follows visual order of appearance from top-left to bottom-right). (b) YtqA/YhcC gene cluster data mapped to an exported table of the AS100 reptime 55 YtqA/YhcC family SSN. (c) YtqA/YhcC gene cluster data-to-SSN cluster mapped data master sheet. (d) SSN-mapped YtqA/YhcC gene cluster data was transformed relative to unique metabolic category per gene cluster; data was used in subsequent metabolic category and gene symbol/family name analyses. (e) Taxonomic group distributions YtqA/YhcC gene clusters, MnmC1/MnmC2/MnmC1C2 fusion analysis data mapping to SSN. (f) Taxonomic group distributions YtqA/YhcC gene clusters, MnmC1/MnmC2/MnmC1C2 fusion analysis data mapping to SSN expanded relative to SSN cluster numbers.

### **Data S9**

SSN file available in the FigShare depository: <https://doi.org/10.6084/m9.figshare.25403692.v1>.



## References

1. Lanie JA, Ng WL, Kazmierczak KM, Andrzejewski TM, Davidsen TM, Wayne KJ, Tettelin H, Glass JI, Winkler ME. 2007. Genome sequence of Avery's virulent serotype 2 strain D39 of *Streptococcus pneumoniae* and comparison with that of unencapsulated laboratory strain R6. *J Bacteriol* 189:38-51
2. Tsui HCT, Joseph M, Zheng JJ, Perez AJ, Manzoor I, Rued BE, Richardson JD, Branny P, Doubravová L, Massidda O, Winkler ME. 2023. Negative regulation of MurZ and MurA underlies the essentiality of GpsB- and StkP-mediated protein phosphorylation in *Streptococcus pneumoniae* D39. *Mol Microbiol* 120:351-383.
3. Koo B-M, Kritikos G, Farelli JD, Todor H, Tong K, Kimsey H, Wapinski I, Galardini M, Cabal A, Peters JM, Hachmann A-B, Rudner DZ, Allen KN, Typas A, Gross CA. 2017. Construction and analysis of two genome-scale deletion libraries for *Bacillus subtilis*. *Cell Syst* 4:291-305.e7.
4. Ajdić D, McShan WM, McLaughlin RE, Savić G, Chang J, Carson MB, Primeaux C, Tian R, Kenton S, Jia H, Lin S, Qian Y, Li S, Zhu H, Najjar F, Lai H, White J, Roe BA, Ferretti JJ. 2002. Genome sequence of *Streptococcus mutans* UA159, a cariogenic dental pathogen. *Proc Natl Acad Sci U S A* 99:14434-9
5. Baba T, Ara T, Hasegawa M, Takai Y, Okumura Y, Baba M, Datsenko KA, Tomita M, Wanner BL, Mori H. 2006. Construction of *Escherichia coli* K-12 in-frame, single-gene knockout mutants: the Keio collection. *Mol Syst Biol* 2:2006.0008.
6. Guzman LM, Belin D, Carson MJ, Beckwith J. 1995. Tight regulation, modulation, and high-level expression by vectors containing the arabinose PBAD promoter. *J Bacteriol* 177:4121-4130.
7. Olson RD, Assaf R, Brettin T, Conrad N, Cucinell C, Davis JJ, Dempsey DM, Dickerman A, Dietrich EM, Kenyon RW, Kuscuoglu M, Lefkowitz EJ, Lu J, Machi D, Macken C, Mao C, Niewiadomska A, Nguyen M, Olsen GJ, Overbeek JC, Parrello B, Parrello V, Porter JS, Pusch GD, Shukla M, Singh I, Stewart L, Tan G, Thomas C, VanOeffelen M, Vonstein V, Wallace ZS, Warren AS, Wattam AR, Xia F, Yoo H, Zhang Y, Zmasek CM, Scheuermann RH, Stevens RL. 2023. Introducing the Bacterial and Viral Bioinformatics Resource Center (BV-BRC): a resource combining PATRIC, IRD and ViPR. *Nucleic Acids Res* 51:D678-D689.
